# Supplementary material for: Targeting senescence-like fibroblasts radiosensitizes non–small cell lung cancer and reduces radiation-induced pulmonary fibrosis
Source: PubMed Central journal article supplement (PMC8675198; doi:10.1172/jci.insight.146334), 2021-12-08
Supplement: jciinsight-6-146334-s076.pdf [file jciinsight-6-146334-s076.pdf]

# Targeting senescence-like fibroblasts radiosensitizes non-small cell lung cancer and reduces radiation-induced pulmonary fibrosis

*Jingshu Meng<sup>†1</sup>, Yan Li<sup>†1</sup>, Chao Wan<sup>†1</sup>, Yajie Sun<sup>†</sup>, Xiaomeng Dai<sup>†</sup>, Jing Huang<sup>†</sup>, Yan Hu<sup>†</sup>, Yanan Gao<sup>†</sup>, Bian Wu<sup>†</sup>, Zhanjie Zhang<sup>†</sup>, Ke Jiang<sup>#</sup>, Shuangbing Xu<sup>†</sup>, Jonathan F. Lovell<sup>‡</sup>, Yu Hu<sup>^</sup>, Gang Wu<sup>†</sup>, Honglin Jin<sup>†\*</sup>, and Kunyu Yang<sup>†\*</sup>*

<sup>†</sup>Cancer Center, Union Hospital, Tongji Medical College, Huazhong University of Science and Technology, Wuhan 430022, China

<sup>#</sup>Department of Thoracic Surgery, Union Hospital, Tongji Medical College, Huazhong University of Science and Technology, Wuhan 430022, China

<sup>^</sup>Institute of Hematology, Union Hospital, Tongji Medical College, Huazhong University of Science and Technology, Wuhan 430022, China

<sup>‡</sup>Department of Chemical and Biological Engineering, University at Buffalo, State University of New York. Buffalo, New York 14260, USA

<sup>1</sup> These authors contributed equally to this work.

\*Correspondence: Cancer Center, Union Hospital, Tongji Medical College, Huazhong University of Science and Technology, Wuhan 430022, China. Fax: +86-27-65650733; Tel:

+86-27-85873100.

Email: Honglin Jin, [jin@hust.edu.cn](mailto:jin@hust.edu.cn); Kunyu Yang, [yangkuny@hust.edu.cn](mailto:yangkuny@hust.edu.cn);

### Conflict of interest

The authors have declared that no conflict of interest exists.

**Keywords:** fibroblasts, CAFs, senescence, radiosensitivity, pulmonary fibrosis, FOXO4-DRI, NSCLC

### Supplementary information

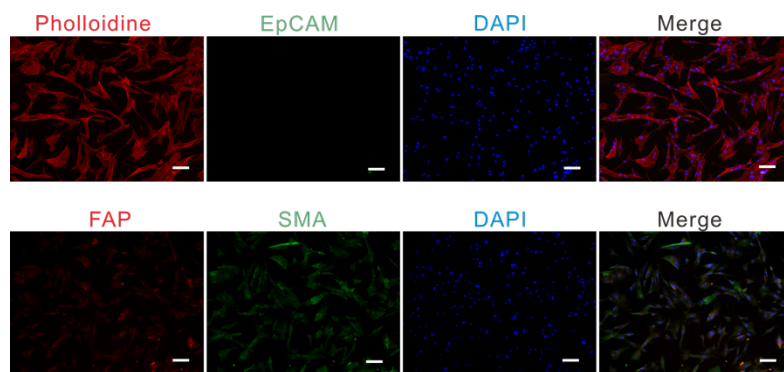

**Figure S1.** Representative images of primary CAFs obtained from surgical specimens detected by immunofluorescence staining. Scale bar, 100  $\mu$ m.

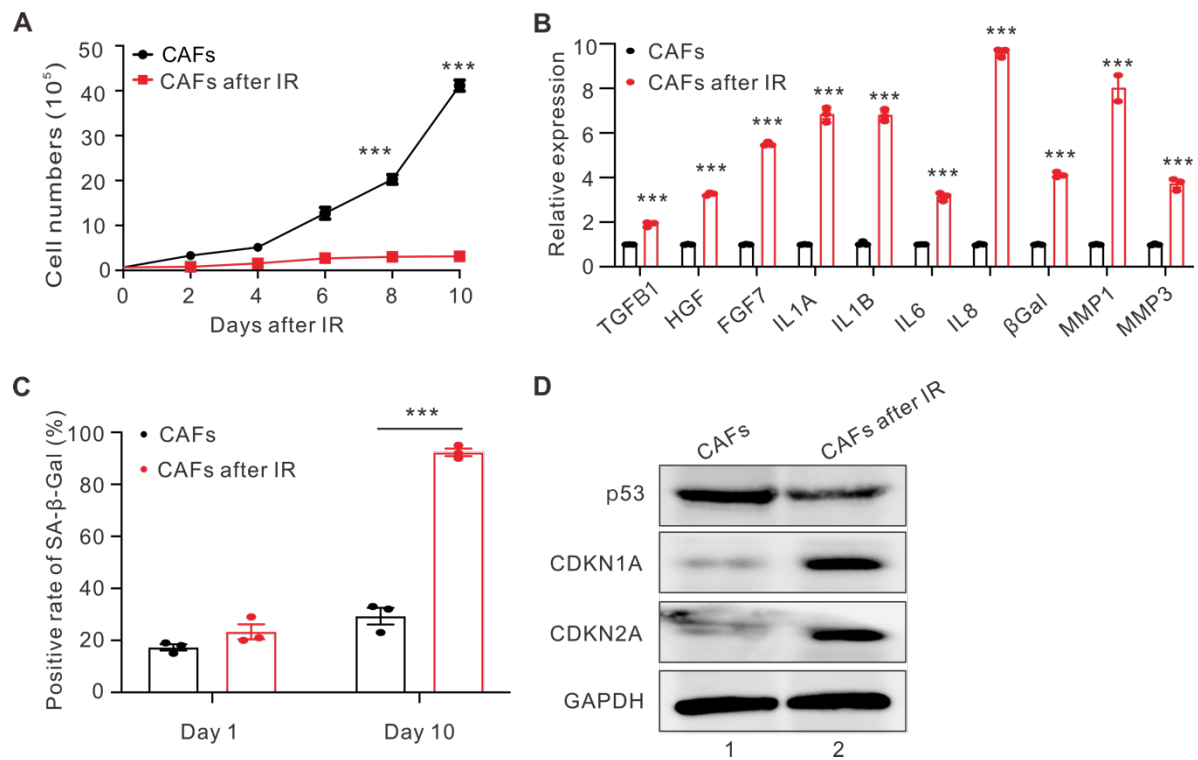

**Figure S2. IR-induced CAFs senescence. (A)** Cell proliferation curves of CAFs with or without 10-Gy IR.

The indicated results represent the means  $\pm$  SEM of three independent experiments, analyzed by two-way ANOVA. **(B)** mRNA expression of SASP in CAFs 10 days after 10-Gy IR. The indicated results represent the means  $\pm$  SEM of three independent experiments, analyzed by Student's t test. **(C)** Positive rate of SA- $\beta$ -Gal staining in CAFs 10 days after 10-Gy IR. The indicated results represent the means  $\pm$  SEM of three independent experiments, analyzed by two-way ANOVA. **(D)** Western blot identifying the gene expression changes of senescence-associated genes in CAFs 10 days after IR. \*\*\*  $P < 0.001$ .

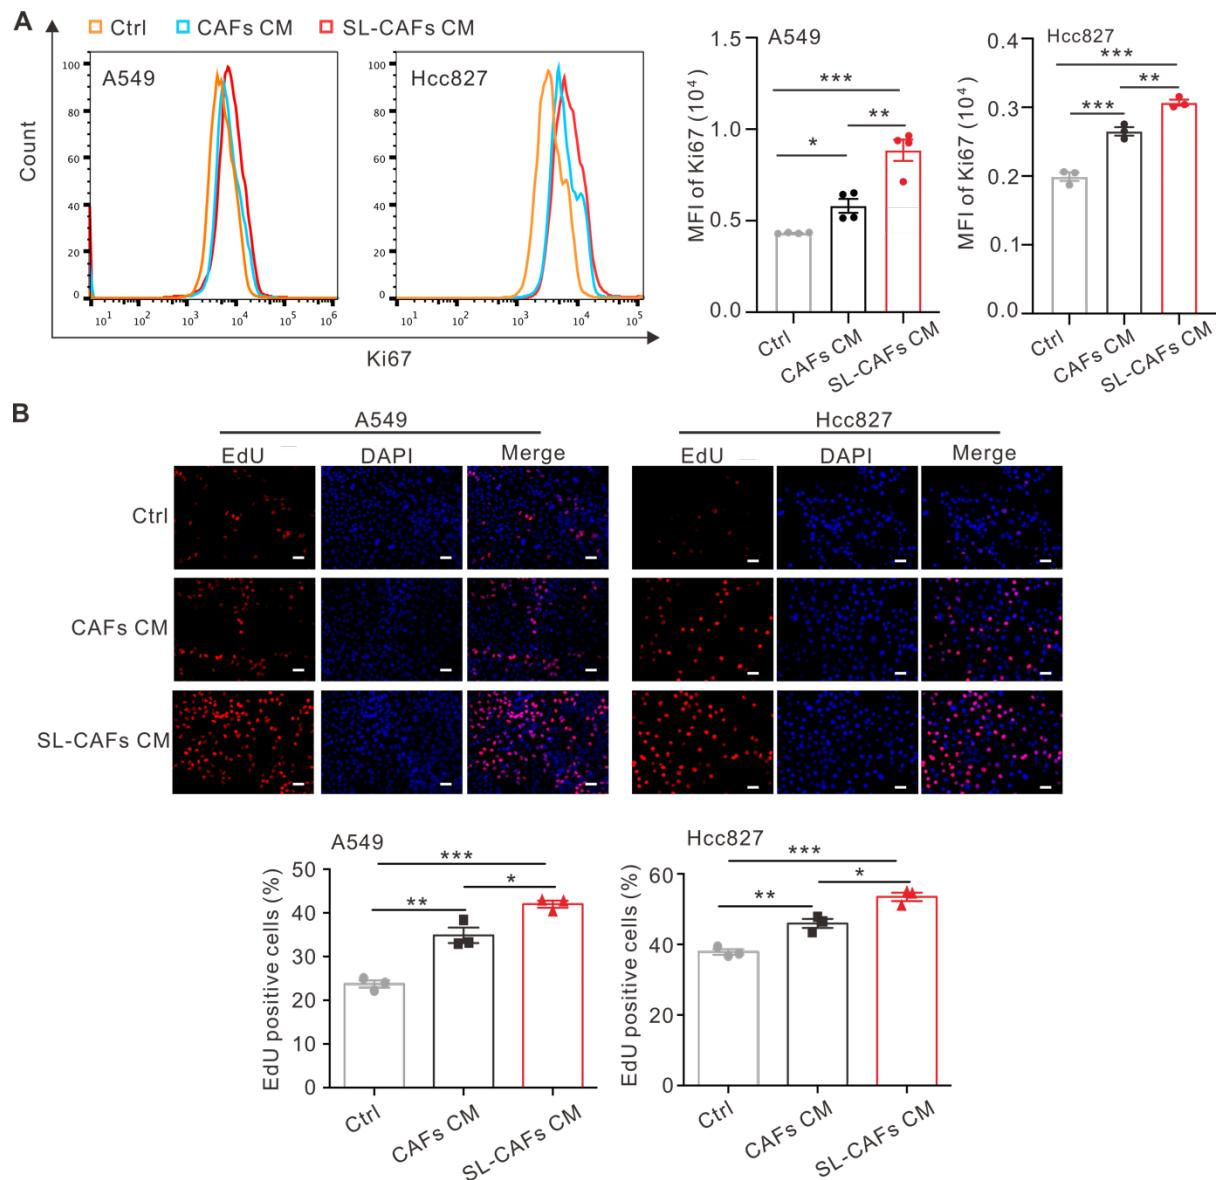

**Figure S3. SL-CAFs promote NSCLC cells Ki67 expression.** (A) Left panel, Ki67 expression of A549 and Hcc827 cells cultured with CAFs CM or SL-CAFs CAFs CM for 48 h detected by flow cytometry. Right panel, quantitative mean fluorescence intensity (MFI) of Ki67 detected by flow cytometry in indicated group of A549 and Hcc827 cells. The results represent the means  $\pm$  SEM of three or four independent experiments, analyzed by one-way ANOVA. (B) Above panel, representative images of EdU staining for A549 and Hcc827 cultured with normal medium, CAFs CM, or SL-CAFs CM for 48 h. Scale bar, 50  $\mu$ m. Below panel, quantification of EdU positive A549 and Hcc827 cells detected by flow cytometry. The indicated results represent the means  $\pm$  SEM of three microscopic fields, analyzed by one-way ANOVA. \*  $P < 0.05$ , \*\*  $P <$

0.01, \*\*\*  $P < 0.001$ . SL-CAFs, senescence-like CAFs.

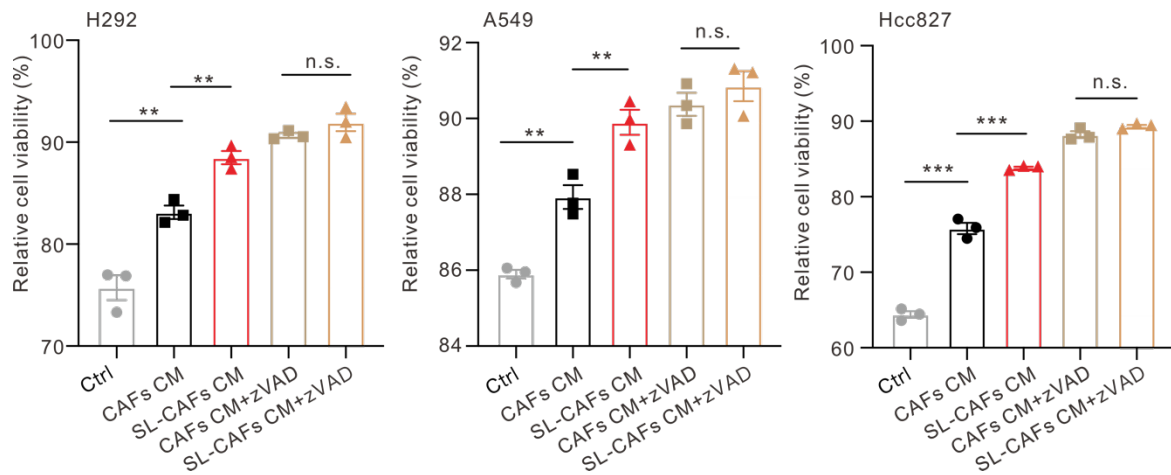

**Figure S4. SL-CAFs increases the viability of NSCLC cells by reducing apoptosis after radiation.** H292, A549, Hcc827 cells cultured in normal medium, CAFs CM and SL-CAFs CM for 48 h and then irradiated by 8-Gy IR. The cell viability determined 72 h after IR and normalized to non-IR cells by CCK8 assay. The indicated results represent the means  $\pm$  SEM of three independent experiments, \*\*  $P < 0.01$ , \*\*\*  $P < 0.001$ , n.s., not statistically significant analyzed by one-way ANOVA. zVAD, Z-VAD-FMK. SL-CAFs, senescence-like CAFs.

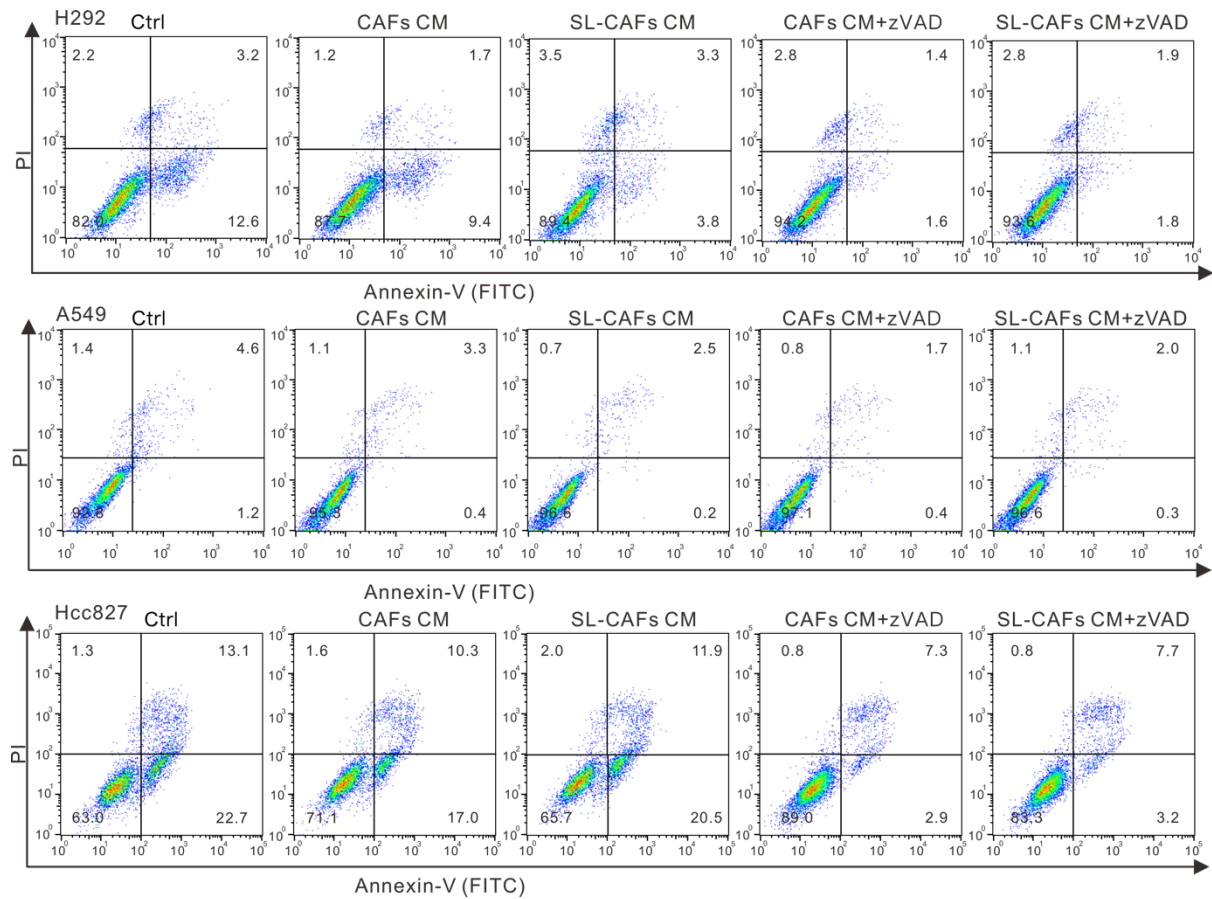

**Figure S5. NSCLC cells apoptosis rates after 8-Gy IR detected by flow cytometry.** Representative images of H292, A549 and Hcc827 cells apoptosis 72 h after 8-Gy IR detected by flow cytometry using annexin-V staining as indicated in different groups. SL-CAFs, senescence-like CAFs.

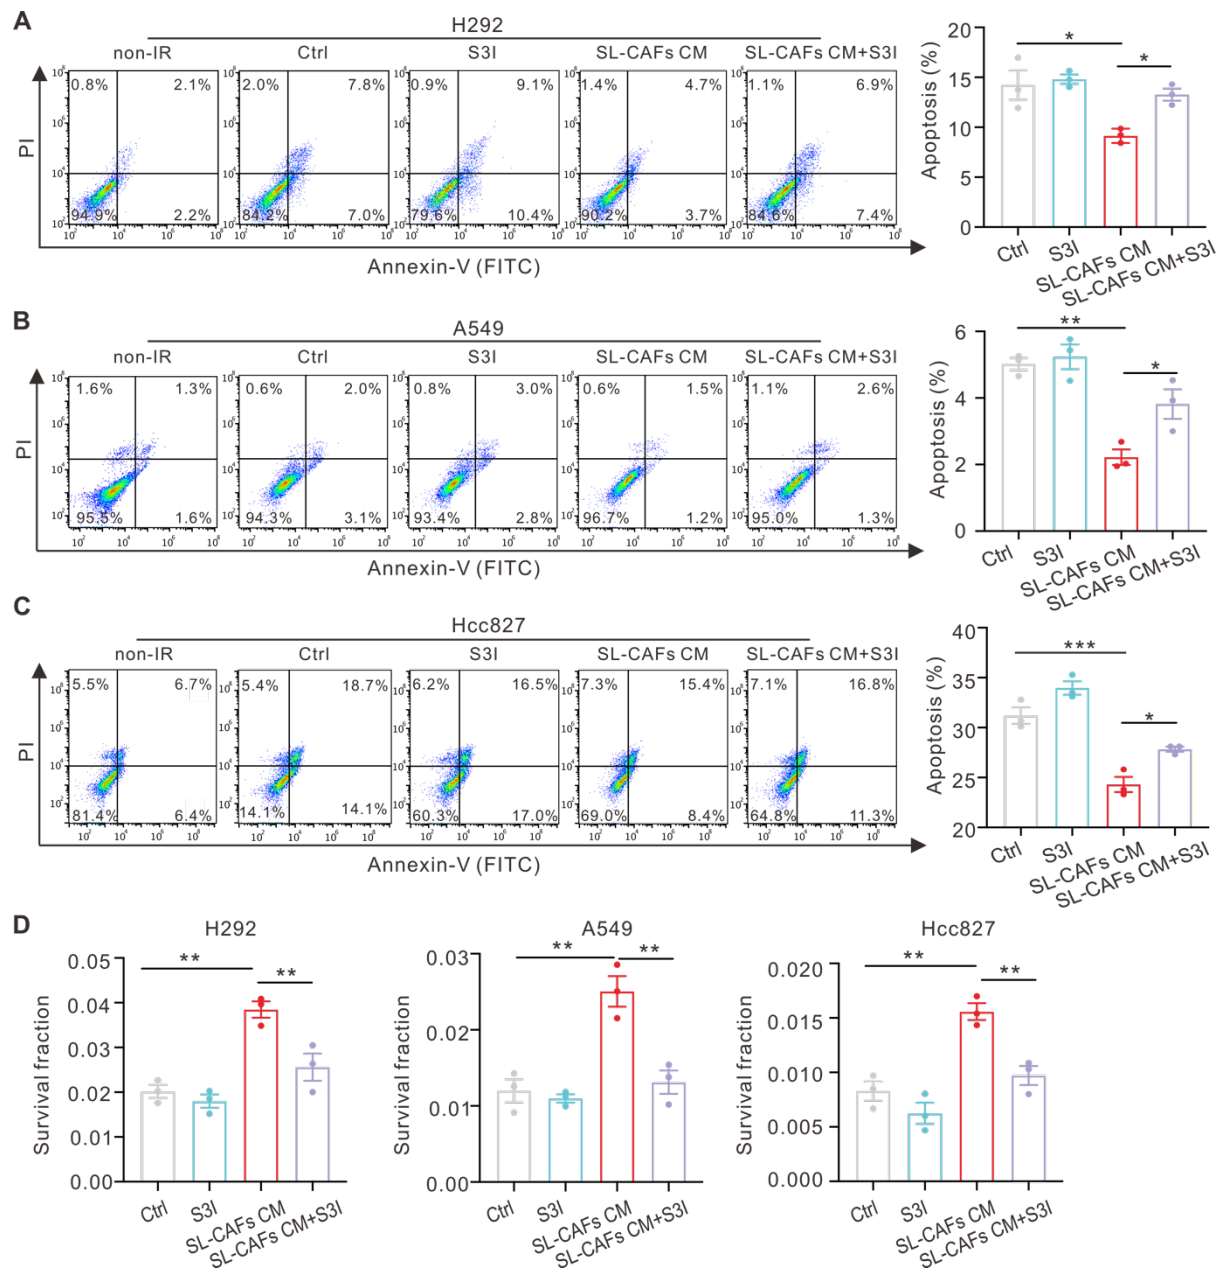

**Figure S6. SL-CAFs induce radioresistance of NSCLC cells *via* STAT3 activation.** (A-C) H292, A549 and Hcc827 cells apoptosis after 8-Gy IR detected by flow cytometry using annexin-V staining (left) and quantitative data of the apoptosis rate (right) as indicated in different groups. (D) Clonogenic survival fraction of H292, A549 and Hcc827 cells after 8-Gy IR with STAT3 inhibitor S3I-201. The indicated results represent the means  $\pm$  SEM of three independent experiments, \*  $P < 0.05$ , \*\*  $P < 0.01$ , \*\*\*  $P < 0.001$ , analyzed by one-way ANOVA. S3I, S3I-201. SL-CAFs, senescence-like CAFs.

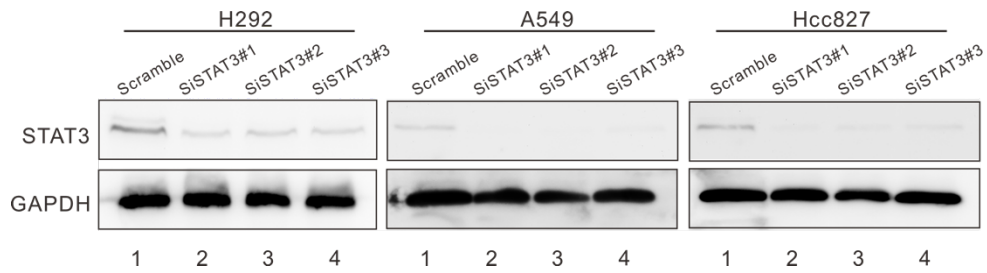

**Figure S7. Western blot identifying the knockdown effect of STAT3 gene by three designed siRNA.**

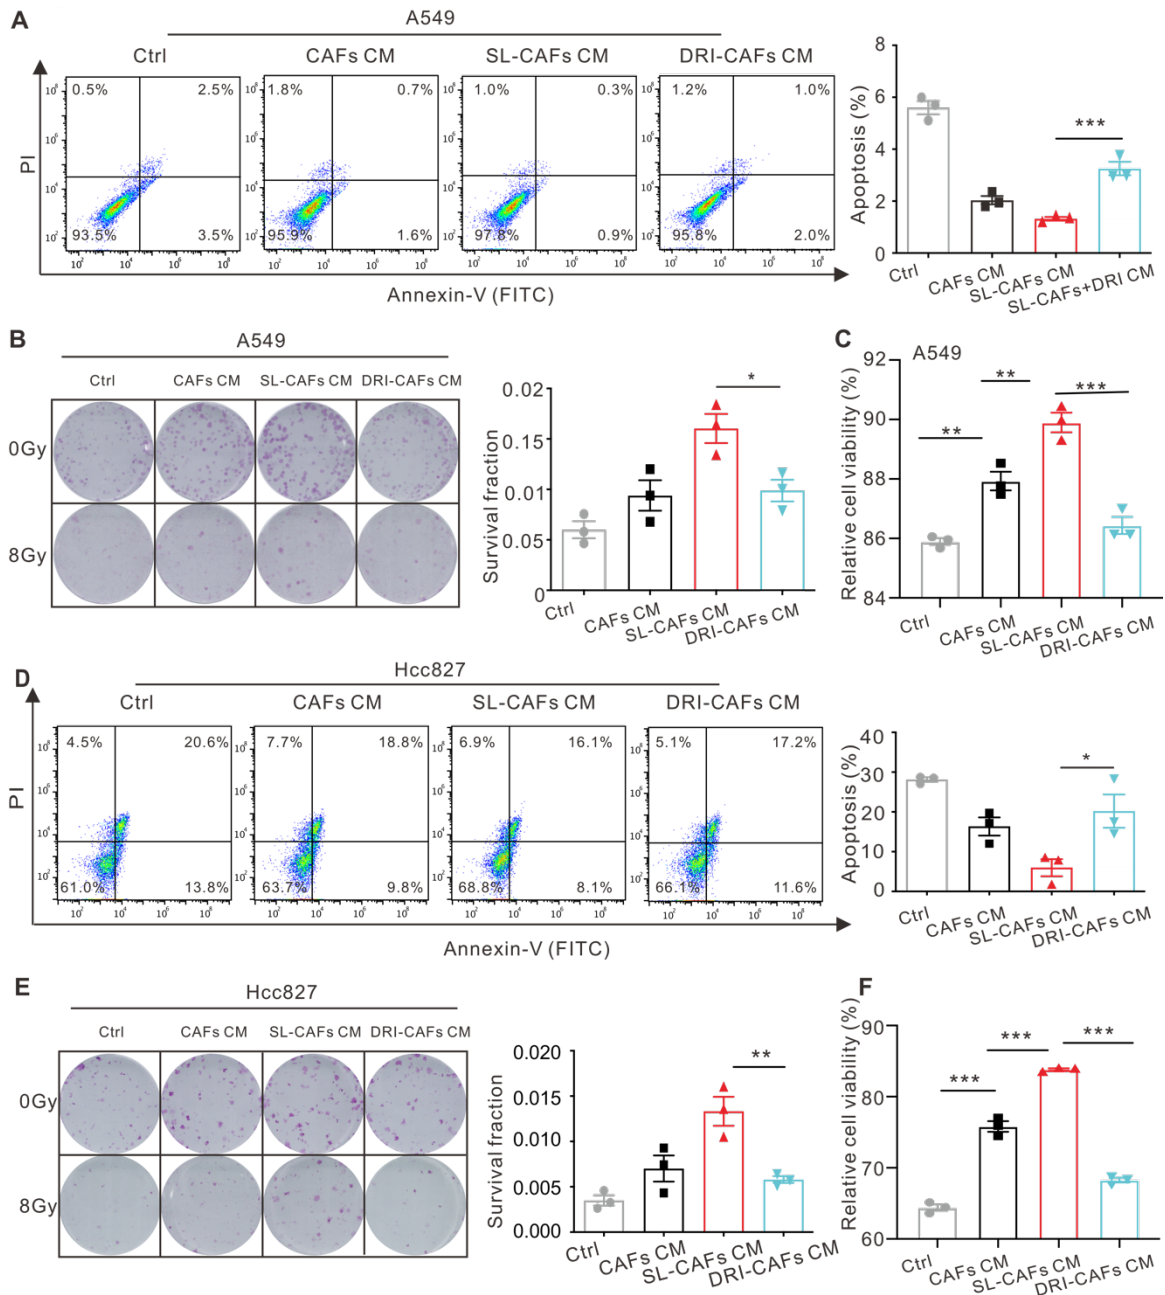

**Figure S8. Reverse of A549 and Hcc827 cells radioresistance with FOXO4-DRI by targeting SL-CAFs.**



**(A)** A549 cells apoptosis after 8-Gy IR detected by flow cytometry using annexin-V staining (left) and quantitative data of the apoptosis rate (right) as indicated in different groups. **(B)** Left panel, representative images of colony formation in A549 cells cultured in different medium with or without 8-Gy IR; right panel, statistically clonogenic survival fraction of A549 cells with different treatment after 8-Gy IR determined by plate clone formation assay. **(C)** A549 cells cultured in different medium for 48 h and then irradiated by 8-Gy IR. The cell viability determined 72 h after IR by CCK8 assay and normalized to non-IR cells. **(D)** Hcc827 cells apoptosis after 8-Gy IR detected by flow cytometry using annexin-V staining (left) and quantitative data of the apoptosis rate (right) as indicated in different groups. **(E)** Left panel, representative images of colony formation in Hcc827 cells cultured in different medium with or without 8-Gy IR; right panel, statistically clonogenic survival fraction of Hcc827 cells with different treatment after 8-Gy IR determined by plate clone formation assay. **(F)** Hcc827 cells cultured in different medium for 48 h and then irradiated by 8-Gy IR. The cell viability determined 72 h after IR by CCK8 assay and normalized to non-IR cells. All the indicated results represent the means  $\pm$  SEM of three independent experiments, analyzed by one-way ANOVA. \* $P < 0.05$ , \*\*  $P < 0.01$ , \*\*\*  $P < 0.001$ . SL-CAFs, senescence-like CAFs. DRI-CAFs, senescence-like CAFs co-cultured with FOXO4-DRI.

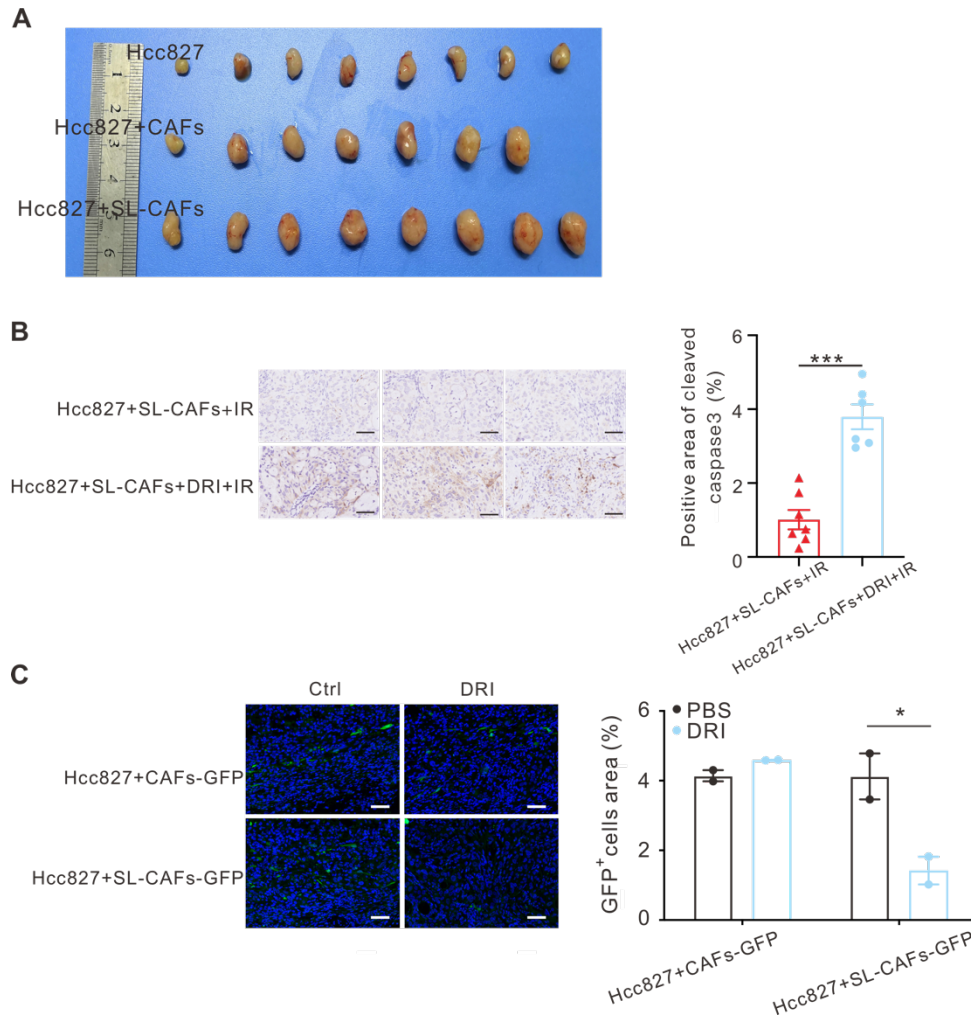

**Figure S9.** (A) The photo of dissected tumors in mice subcutaneously co-injected of Hcc827 cells with CAFs or SL-CAFs. Hcc827 cells injected alone as control. (B) Left panel, representative images of cleaved caspase3 positive cells in xenograft tumors detected by immunohistochemistry staining. Scale bar, 50 $\mu$ m. Right panel, the percentage of cleaved caspase3 positive area in xenograft tumors detected by immunohistochemistry staining. Mean  $\pm$  SEM (3 microscopic fields at 400 $\times$  magnification per mice to evaluate the averaged positive area, n = 6-7 mice per group), analyzed by Student's t-test. (C) Left panel, representative images of GFP<sup>+</sup> cells in xenograft tumors detected by immunofluorescence staining. Scale bar, 50  $\mu$ m. Right panel, the percentage of GFP<sup>+</sup> cells area in xenograft tumors detected by immunofluorescence staining. Mean  $\pm$  SEM (3 microscopic fields at 400 $\times$  magnification per mice to evaluate

the averaged GFP<sup>+</sup> area, n = 2 mice per group), analyzed by Student's t-test. \* $P < 0.05$ , \*\*\*  $P < 0.001$ . SL-CAFs, senescence-like CAFs.

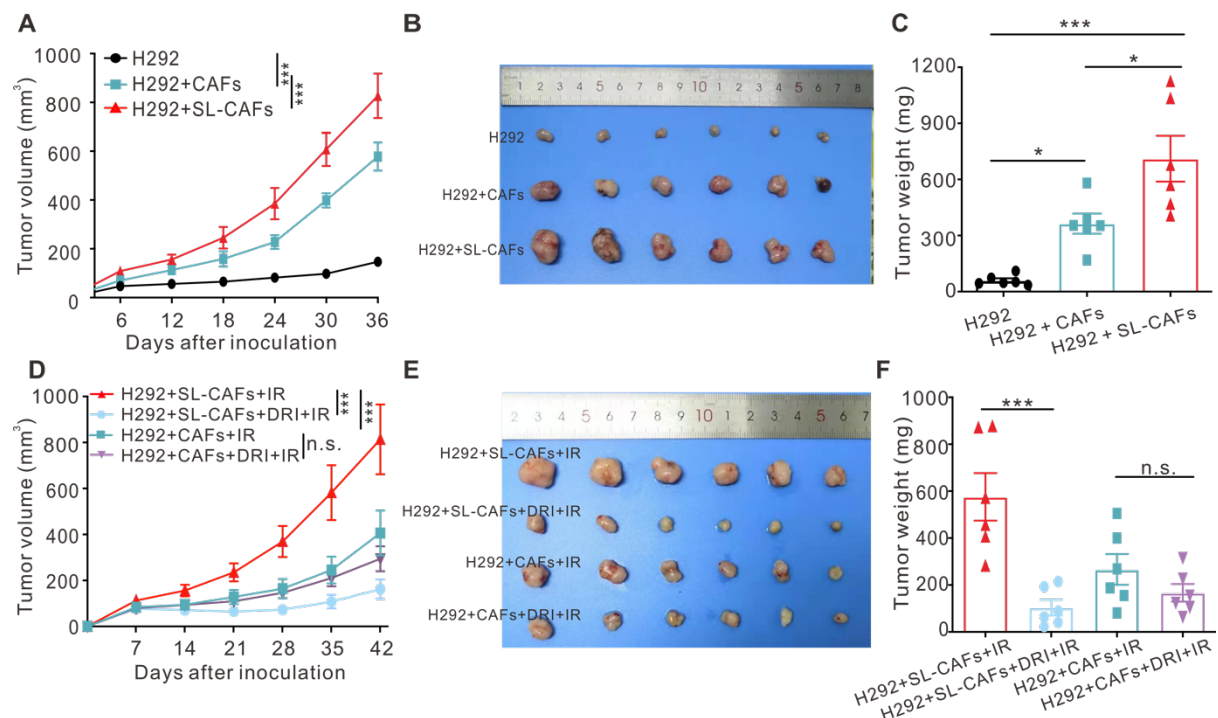

**Figure S10. Effect of FOXO4-DRI in improving radiosensitivity *in vivo*.** (A) Tumor growth curves for mice subcutaneously co-injected of H292 cells with SL-CAFs or CAFs. H292 cells injected alone as control. Mean  $\pm$  SEM (n = 6 mice per group), analyzed by two-way ANOVA. (B) The photo of dissected tumors in mice subcutaneously co-injected of H292 cells with CAFs or SL-CAFs and (C) quantification of tumor weights in each group. Mean  $\pm$  SEM (n = 6 mice per group), analyzed by one-way ANOVA. (D) Tumor growth curves for mice in different groups after IR. Mean  $\pm$  SEM (n = 6 mice per group), analyzed by two-way ANOVA. (E) The photo of dissected tumors and (F) quantification of tumor weights in each group after IR. Mean  $\pm$  SEM (n = 6 mice per group), analyzed by one-way ANOVA. \* $P < 0.05$ , \*\*\*  $P < 0.001$ , n.s., not statistically significant. SL-CAFs, senescence-like CAFs.

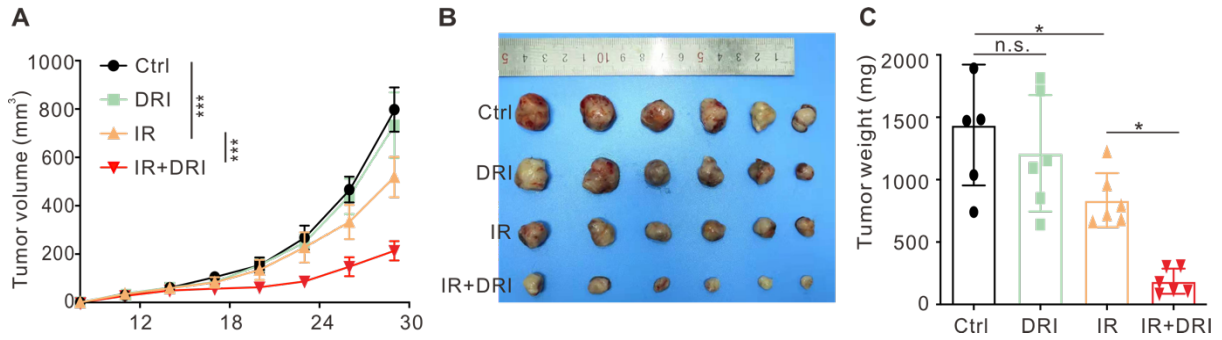

**Figure S11. Effect of FOXO4-DRI on improving radiosensitivity *in vivo*.** (A) Tumor growth curves for C57BL/6 mice subcutaneously injected of Lewis cells with different treatment. Mean  $\pm$  SEM (n = 6 mice per group), analyzed by two-way ANOVA. (B) The photo of dissected tumors and (C) quantification of tumor weights in each group. Mean  $\pm$  SEM (n = 6 mice per group), analyzed by one-way ANOVA. \*  $P < 0.05$ , \*\*\*  $P < 0.001$ , n.s., not statistically significant.

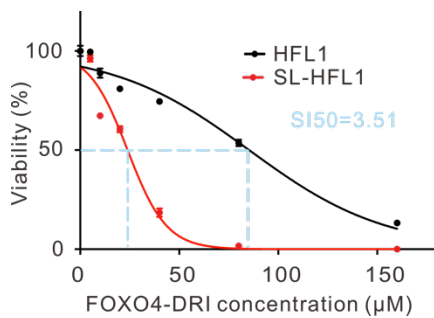

**Figure S12. Cell viability assay of HFL1 and SL-HFL1 treating with different concentrations of FOXO4-DRI for 72 h.** The indicated results represent the means  $\pm$  SEM of three independent experiments. SL-HFL1, senescence-like HFL1.

**Table S1. Information of patients whose clinical samples were used for isolation of CAFs.**

| Patients ID | Gender | Age (y) | Pathological type | Stage | TNM                                           |
|-------------|--------|---------|-------------------|-------|-----------------------------------------------|
| NSCLC001    | M      | 77      | LUAD              | III A | T <sub>1b</sub> N <sub>2</sub> M <sub>0</sub> |
| NSCLC002    | M      | 70      | LUAD              | I B   | T <sub>2a</sub> N <sub>0</sub> M <sub>0</sub> |
| NSCLC003    | M      | 71      | LUSC              | II B  | T <sub>3</sub> N <sub>0</sub> M <sub>0</sub>  |
| NSCLC004    | F      | 75      | LUAD              | III A | T <sub>1a</sub> N <sub>2</sub> M <sub>0</sub> |
| NSCLC005    | M      | 58      | LUAD              | I A   | T <sub>1b</sub> N <sub>0</sub> M <sub>0</sub> |
| NSCLC006    | F      | 48      | LUAD              | III A | T <sub>1c</sub> N <sub>2</sub> M <sub>0</sub> |
| NSCLC007    | M      | 65      | LUAD              | I A   | T <sub>1b</sub> N <sub>0</sub> M <sub>0</sub> |
| NSCLC008    | F      | 56      | LUAD              | III A | T <sub>4</sub> N <sub>0</sub> M <sub>0</sub>  |
| NSCLC009    | F      | 55      | LUAD              | III A | T <sub>2a</sub> N <sub>2</sub> M <sub>0</sub> |
| NSCLC010    | M      | 50      | LUSC              | II B  | T <sub>2b</sub> N <sub>1</sub> M <sub>0</sub> |
| NSCLC011    | F      | 58      | LUAD              | I A   | T <sub>1c</sub> N <sub>0</sub> M <sub>0</sub> |
| NSCLC012    | M      | 65      | LUAD              | I B   | T <sub>2a</sub> N <sub>0</sub> M <sub>0</sub> |
| NSCLC013    | M      | 64      | LUSC              | II A  | T <sub>2b</sub> N <sub>0</sub> M <sub>0</sub> |
| NSCLC014    | M      | 60      | LUSC              | II A  | T <sub>2a</sub> N <sub>1</sub> M <sub>0</sub> |
| NSCLC015    | M      | 62      | LUAD              | III A | T <sub>2a</sub> N <sub>2</sub> M <sub>0</sub> |
| NSCLC016    | F      | 63      | LUAD              | I A   | T <sub>1c</sub> N <sub>0</sub> M <sub>0</sub> |
| NSCLC017    | M      | 54      | LUAD              | I A   | T <sub>1c</sub> N <sub>0</sub> M <sub>0</sub> |
| NSCLC018    | M      | 67      | LUAD              | I A   | T <sub>1b</sub> N <sub>0</sub> M <sub>0</sub> |
| NSCLC019    | M      | 41      | LUAD              | III B | T <sub>4</sub> N <sub>2</sub> M <sub>0</sub>  |
| NSCLC020    | M      | 57      | LUAD              | I A   | T <sub>1c</sub> N <sub>0</sub> M <sub>0</sub> |
| NSCLC021    | M      | 67      | LUSC              | II A  | T <sub>2b</sub> N <sub>0</sub> M <sub>0</sub> |
| NSCLC022    | F      | 56      | LUAD              | I A   | T <sub>1c</sub> N <sub>0</sub> M <sub>0</sub> |
| NSCLC023    | M      | 61      | LUAD              | I B   | T <sub>2a</sub> N <sub>0</sub> M <sub>0</sub> |
| NSCLC024    | F      | 61      | LUAD              | III A | T <sub>2a</sub> N <sub>2</sub> M <sub>0</sub> |

NSCLC = non-small cell lung cancer, M = male, F = female, LUAD = lung adenocarcinoma, LUSC = lung squamous cell carcinoma, T = tumor, N = node, M = metastasis.

**Table S2. Plating efficiencies of NSCLC cells in plate clone formation assay.**

|      | H292   |         |            | A549   |         |            | Hcc827 |         |            |
|------|--------|---------|------------|--------|---------|------------|--------|---------|------------|
|      | Ctrl   | CAFs CM | SL-CAFs CM | Ctrl   | CAFs CM | SL-CAFs CM | Ctrl   | CAFs CM | SL-CAFs CM |
| 0 Gy | 0.1853 | 0.1853  | 0.1907     | 0.3373 | 0.3433  | 0.3327     | 0.1900 | 0.1893  | 0.1907     |
| 2 Gy | 0.0623 | 0.0757  | 0.0913     | 0.1183 | 0.1353  | 0.1320     | 0.0530 | 0.0653  | 0.0660     |
| 4 Gy | 0.0255 | 0.0408  | 0.0540     | 0.0438 | 0.0570  | 0.0645     | 0.0093 | 0.0173  | 0.0262     |
| 6 Gy | 0.0073 | 0.0163  | 0.0318     | 0.0107 | 0.0145  | 0.0213     | 0.0015 | 0.0033  | 0.0067     |
| 8 Gy | 0.0009 | 0.0028  | 0.0086     | 0.0018 | 0.0032  | 0.0074     | 0.0003 | 0.0009  | 0.0023     |

**Table S3. Sequences of primer used in RT-qPCR analysis.**

| Gene name     | Forward primer            | Reverse primer               |
|---------------|---------------------------|------------------------------|
| <i>TP53</i>   | GAGTCAACGGATTTGGTCGT      | GACAAGCTTCCCGTTCTCAG         |
| <i>CDKN1A</i> | GACAGCAGAGGAAGACCATGTGGAC | GAGTGGTAGAAATCTGTCATGCTG     |
| <i>CDKN2A</i> | CCAACGCACCGAATAGTTACG     | GCGCTGCCCATCATCATG           |
| <i>IL1A</i>   | AGATGCCTGAGATACCCAAAACC   | CCAAGCACACCCAGTAGTCT         |
| <i>IL1B</i>   | ATGATGGCTTATTACAGTGGCAA   | GTCGGAGATTCGTAGCTGGA         |
| <i>IL6</i>    | CGGTCCAGTTGCCTTCTCCC      | GAGTGGCTGTCTGTGTGGGG         |
| <i>IL8</i>    | CTCTTGGCAGCCTTCCTGATT     | TATGCACTGACATCTAAGTTCTTTAGCA |
| <i>βGal</i>   | TTAGGATGTGCATTTTCACCTGA   | CTTTGGCACTGCAGGGATG          |
| <i>TGFB1</i>  | CAATTCCTGGCGATACCTCAG     | GCACAACCTCCGGTGACATCAA       |
| <i>FGF7</i>   | CTGAGGATCGATAAAAAGAGGCAA  | ATTCTTCATCTCTTGGGTCCCTT      |
| <i>HGF</i>    | GTTCTGGTCGTGGATGTGC       | TCGGACAAAAATACCAGGACG        |
| <i>MMP1</i>   | GGGCTTGAAGCTGCTTACGA      | TGTCCCTGAACAGCCCAGTAC        |
| <i>MMP3</i>   | AGAGGTGACTCCACTCACAT      | GGTCTGTGAGTGAGTGATAG         |

**Table S4. Sequences of three designed siRNA targeting STAT3.**

| SiRNA | Sense (5'-3')         | Anti-sense (3'-5')    |
|-------|-----------------------|-----------------------|
| #1    | CCACUUUGGUGUUUCAUAATT | UUAUGAAACACCAAAGUGGTT |
| #2    | GCAACAGAUUGCCUGCAUUTT | AAUGCAGGCAAUCUGUUGCTT |
| #3    | CCCGUCAACAAAUUAAGAATT | UUCUAAAUUGUUGACGGGTT  |
